# Supplementary material for: A Description of the Hemolytic Component in Sickle Leg Ulcer: The Role of Circulating miR-199a-5p, miR-144, and miR-126
Source: MDPI journal article supplement (doi:10.3390/biom12020317), 2022-02-17
Supplement: s1 [file s1]

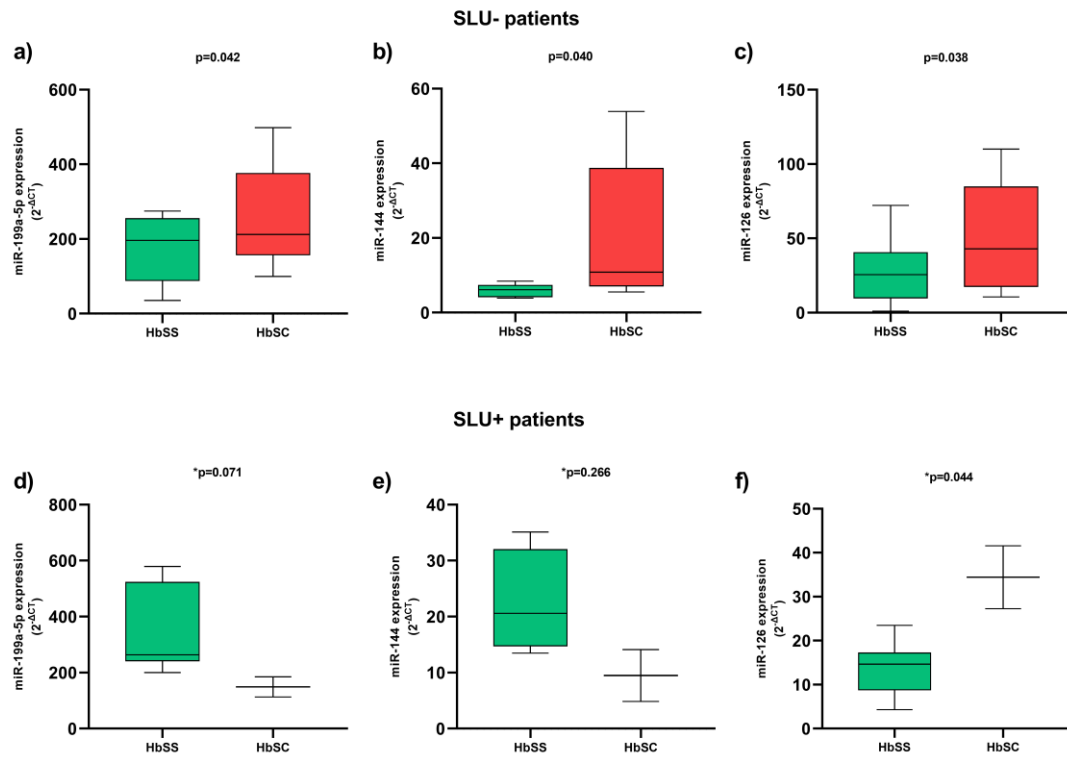

**Figure S1.** Expression of circulating miRNAs in SLU- and SLU+ patients with HbSS and HbSC genotype.

**Table S1.** Biological processes for miR-199a-5p.

| Biological processes                                       | Accession  | Genes                                                  |
|------------------------------------------------------------|------------|--------------------------------------------------------|
| Regulation of transforming growth factor beta2 production  | GO:0032909 | <i>TGFB2, HIF1A</i>                                    |
| Regulation of pri-miRNA transcription by RNA polymerase II | GO:1902893 | <i>TGFB2, HIF1A, ETS1</i>                              |
| Regulation of cellular component organization              | GO:0051128 | <i>TGFB2, HIF1A, ETS1, RAB21, DDX3X, NECTIN1, CLTC</i> |
